# Supplementary material
Source: PubMed Central journal article supplement (PMC4921058)

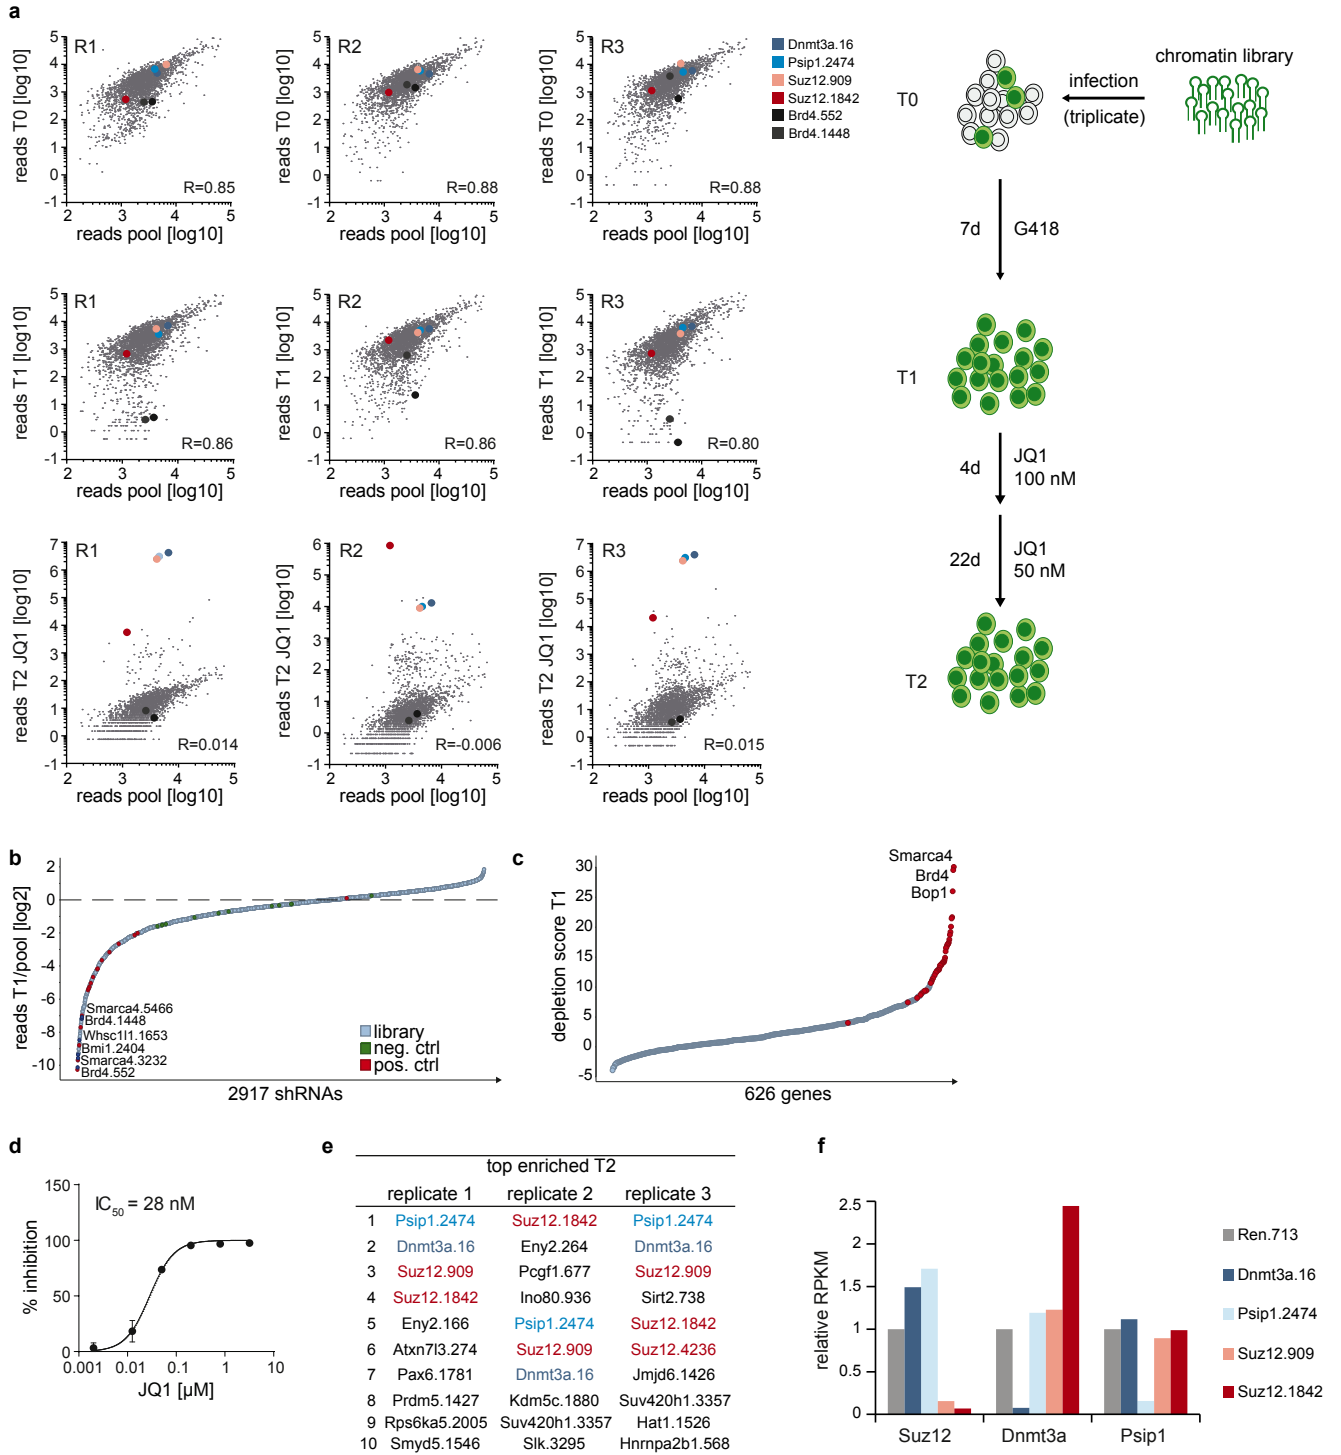

Supplement: NIHMS68846-supplement-ED_Figure_1.pdf [file NIHMS68846-supplement-ED_Figure_1.pdf]

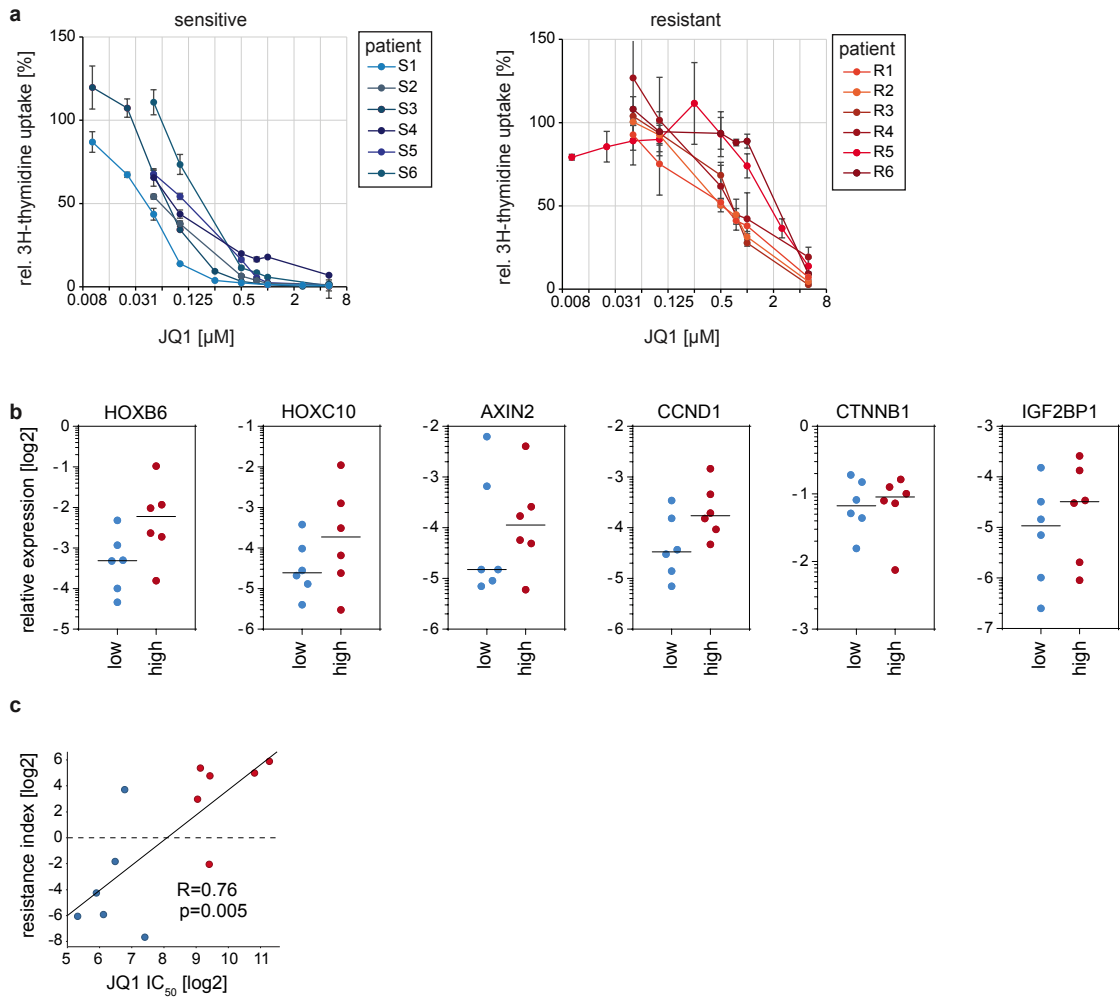

Supplement: NIHMS68846-supplement-ED_Figure_10.pdf [file NIHMS68846-supplement-ED_Figure_10.pdf]

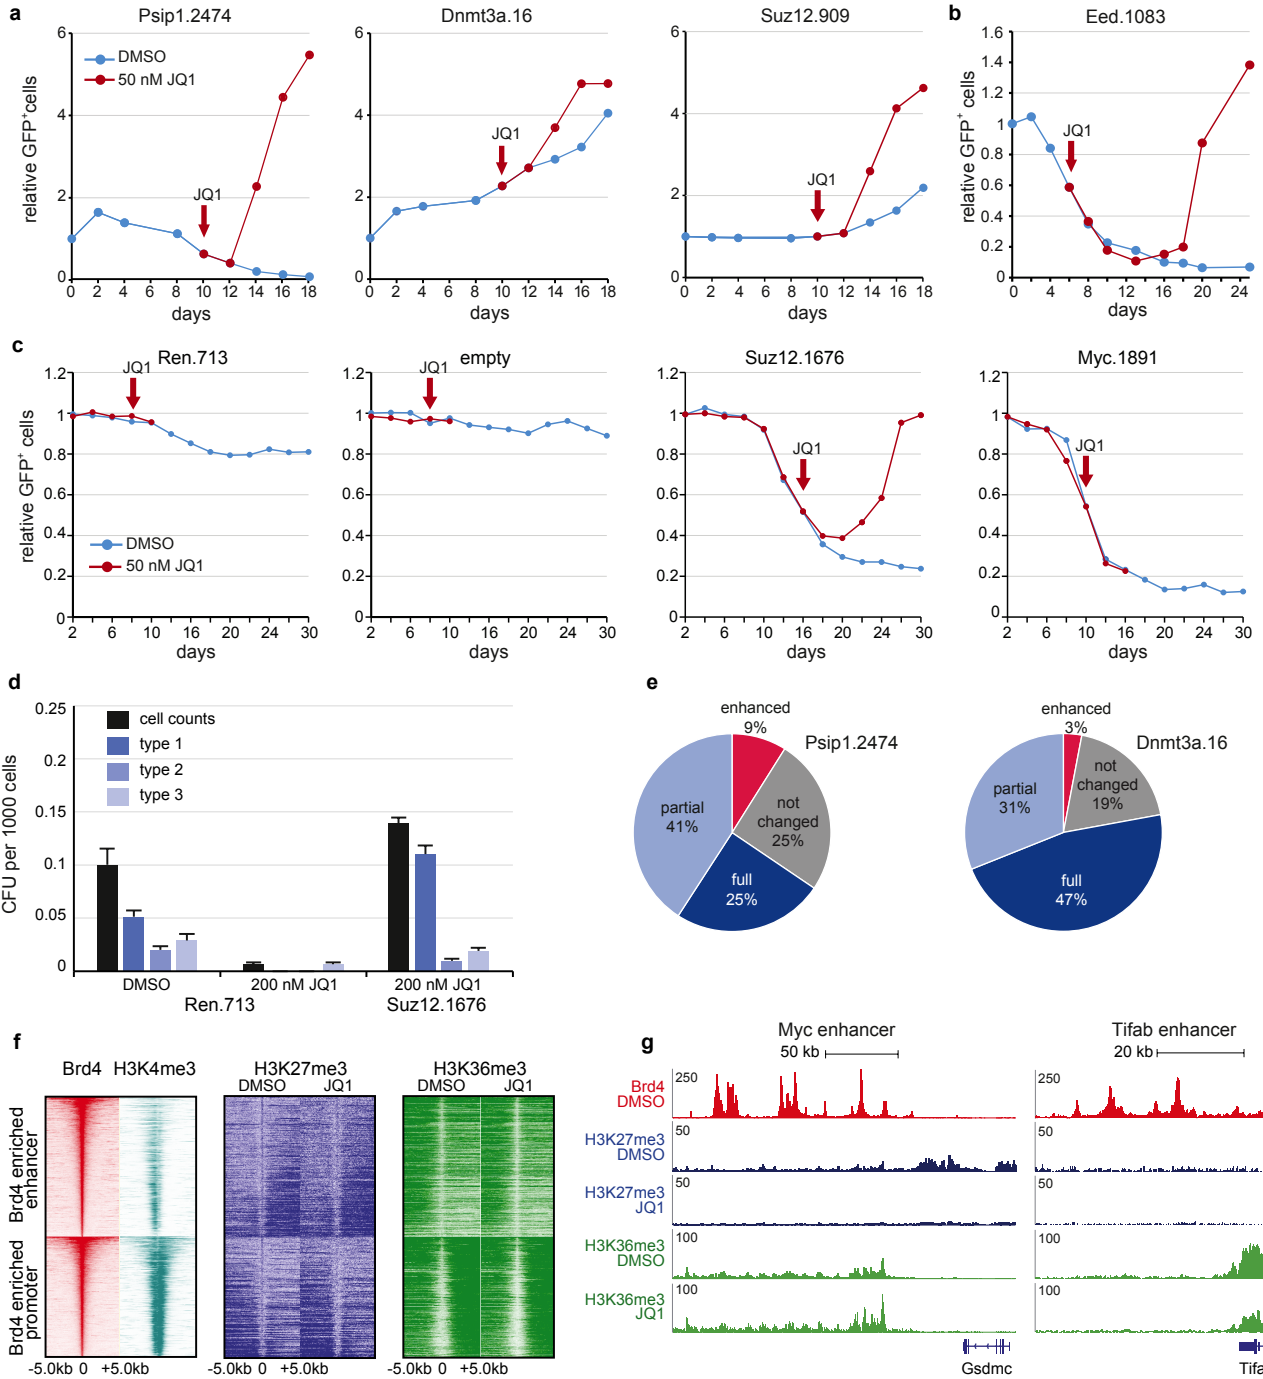

Supplement: NIHMS68846-supplement-ED_Figure_2.pdf [file NIHMS68846-supplement-ED_Figure_2.pdf]

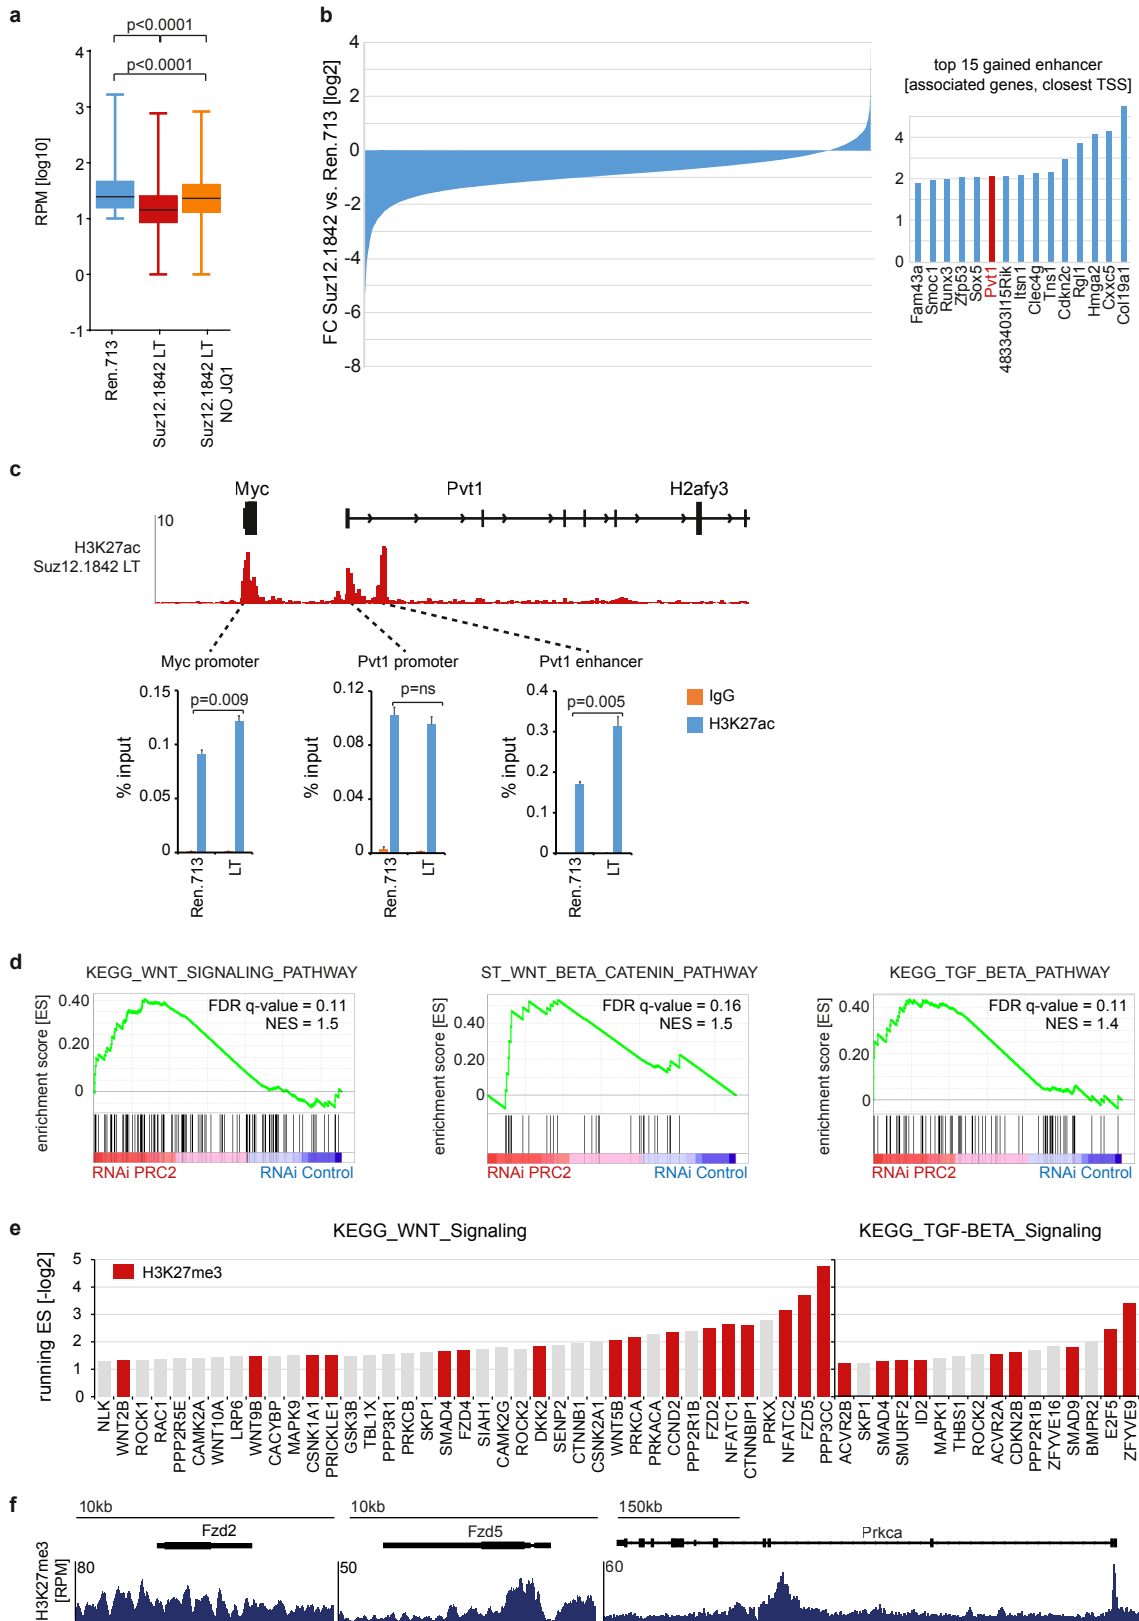

Supplement: NIHMS68846-supplement-ED_Figure_3.pdf [file NIHMS68846-supplement-ED_Figure_3.pdf]

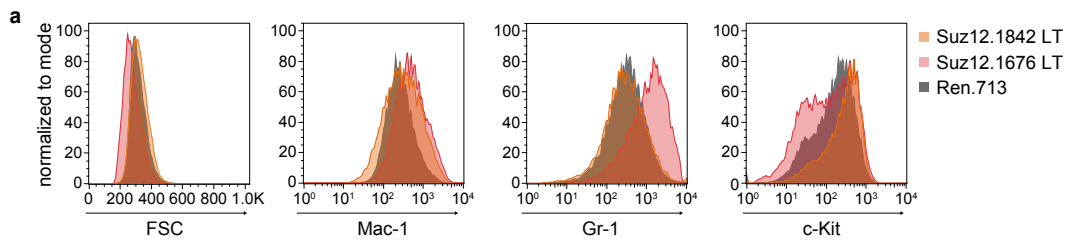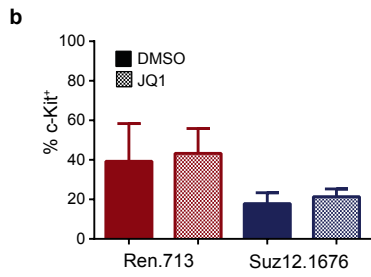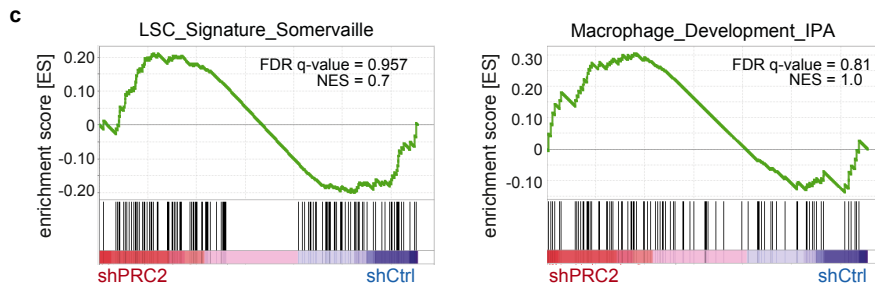

Supplement: NIHMS68846-supplement-ED_Figure_4.pdf [file NIHMS68846-supplement-ED_Figure_4.pdf]

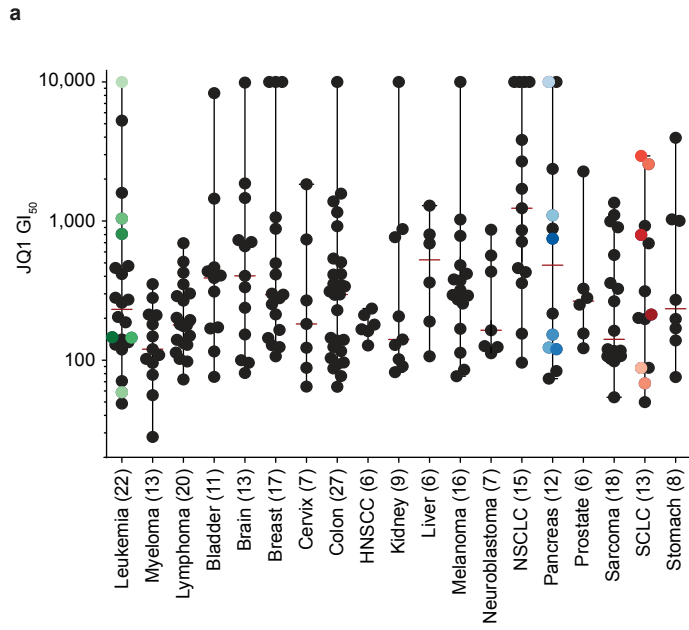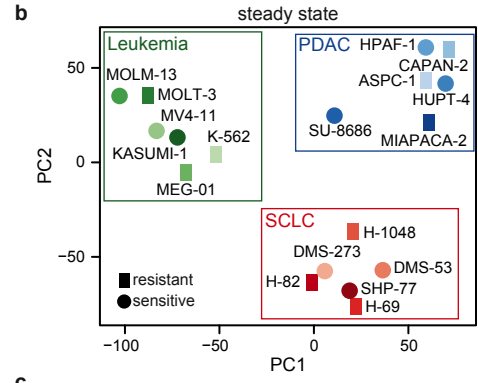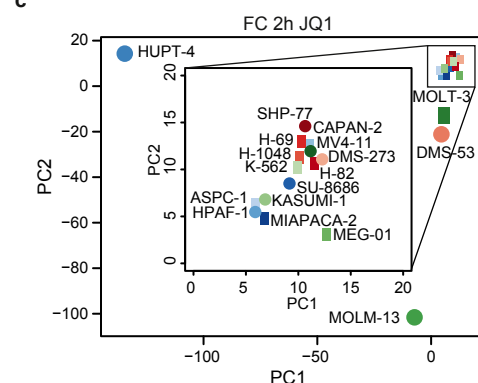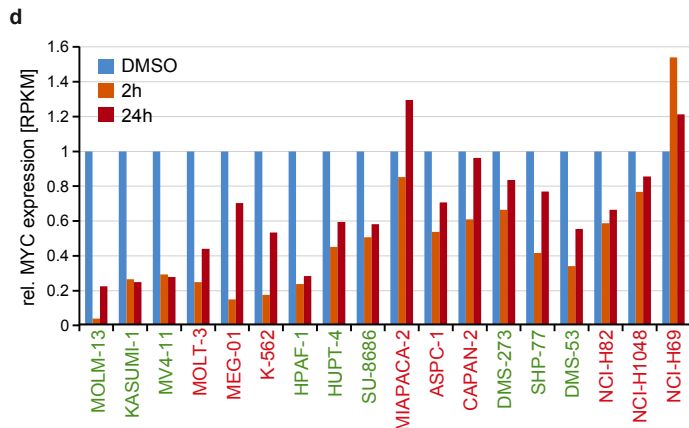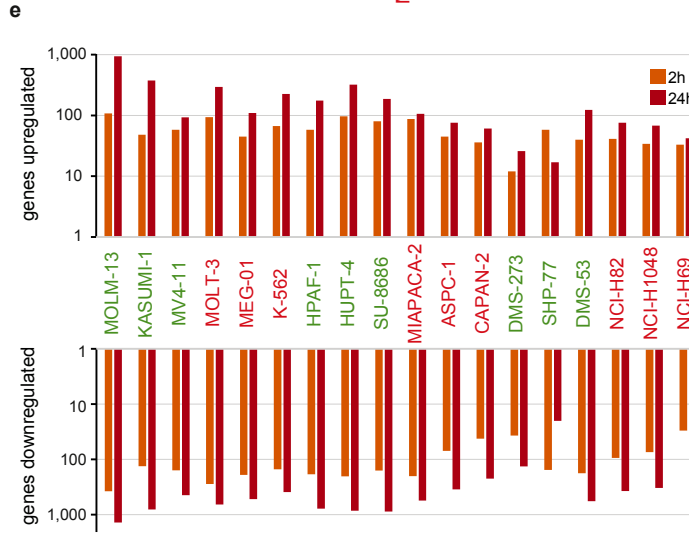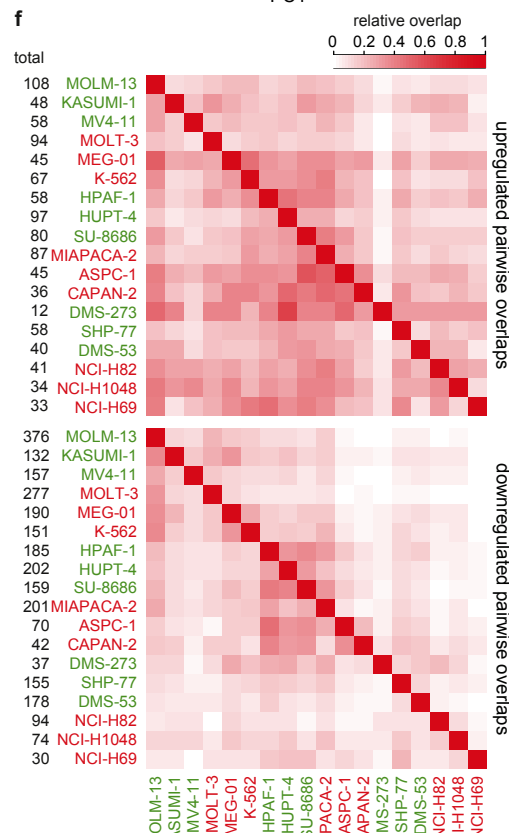

Supplement: NIHMS68846-supplement-ED_Figure_5.pdf [file NIHMS68846-supplement-ED_Figure_5.pdf]

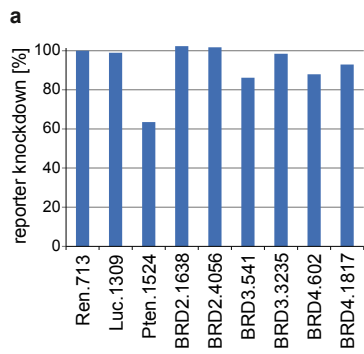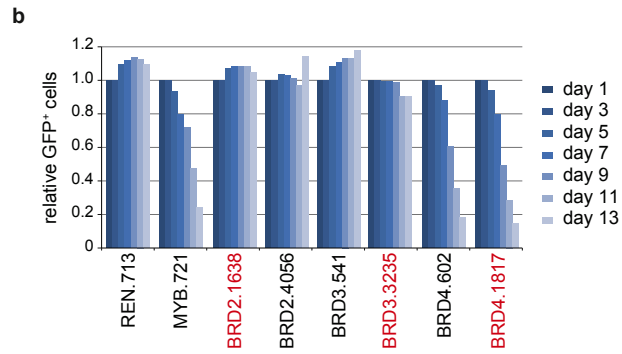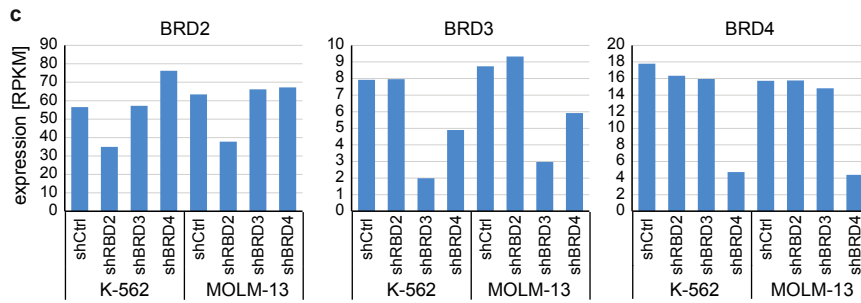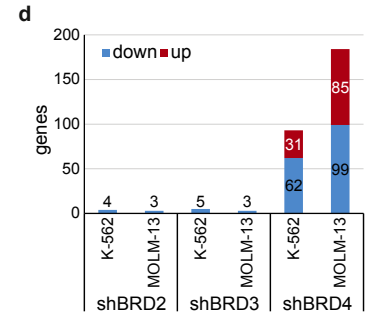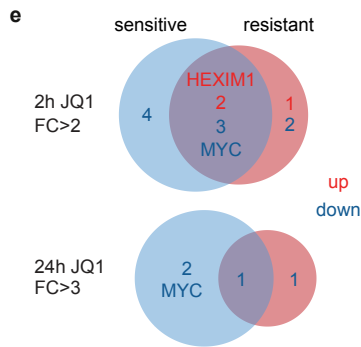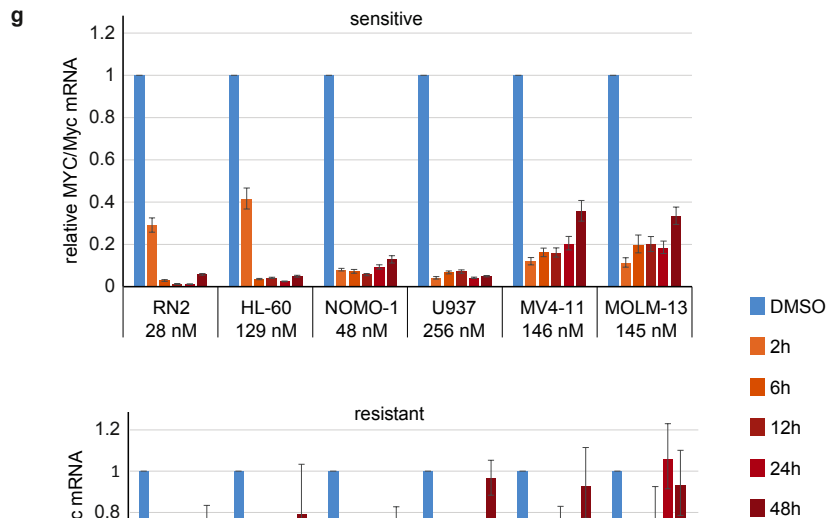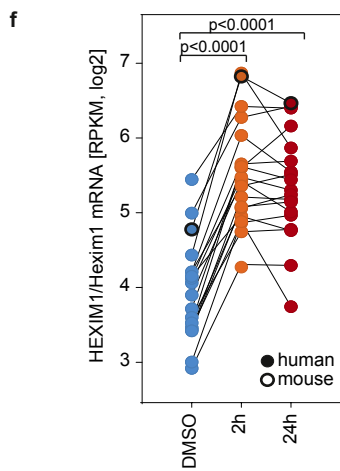

Supplement: NIHMS68846-supplement-ED_Figure_6.pdf [file NIHMS68846-supplement-ED_Figure_6.pdf]

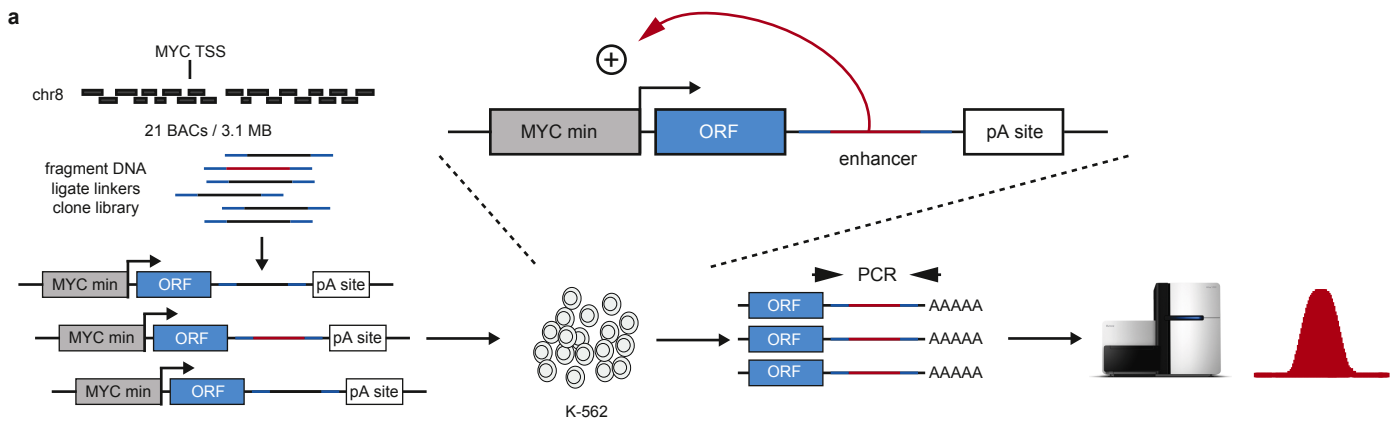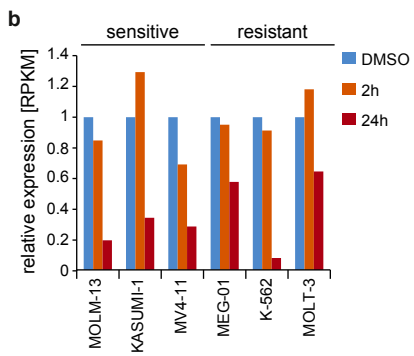

Supplement: NIHMS68846-supplement-ED_Figure_7.pdf [file NIHMS68846-supplement-ED_Figure_7.pdf]

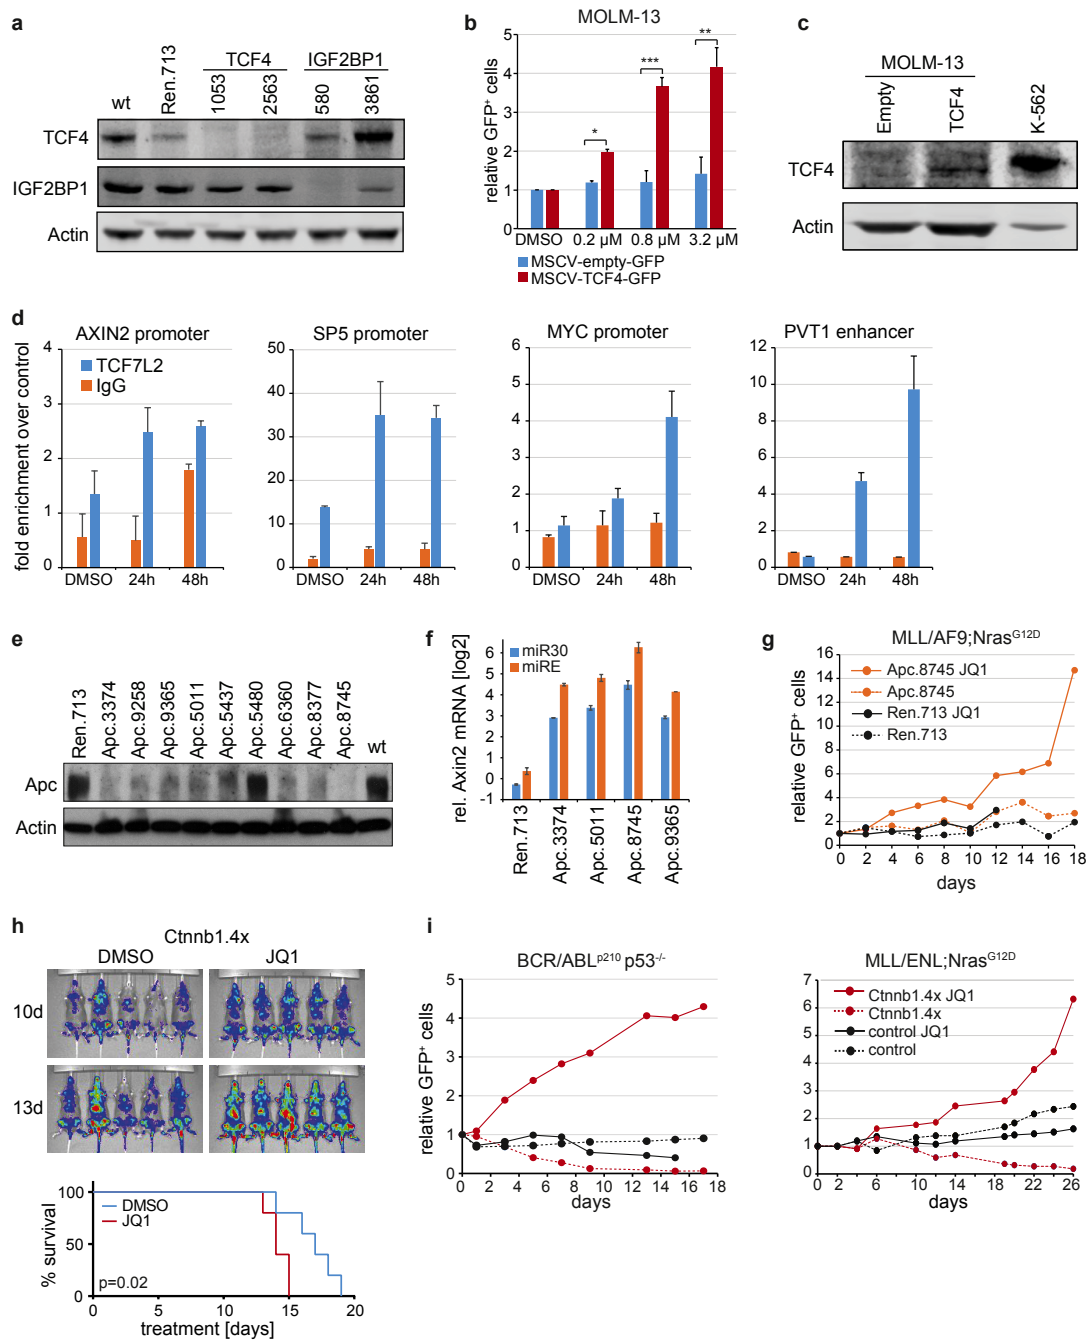

Supplement: NIHMS68846-supplement-ED_Figure_8.pdf [file NIHMS68846-supplement-ED_Figure_8.pdf]

**a** CCLE (microarray)

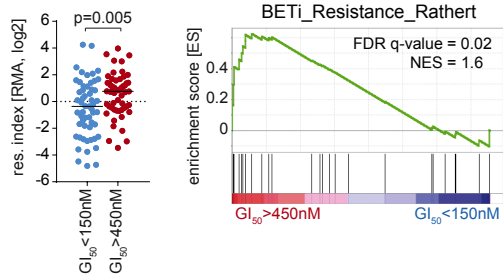

**b** RNAseq (Klijn et al. 2015)

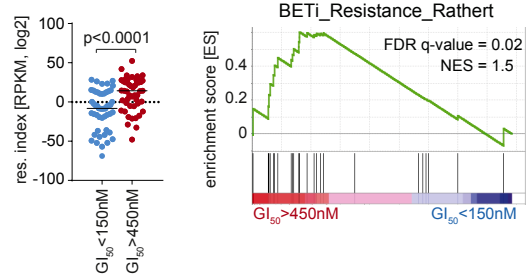

**c**

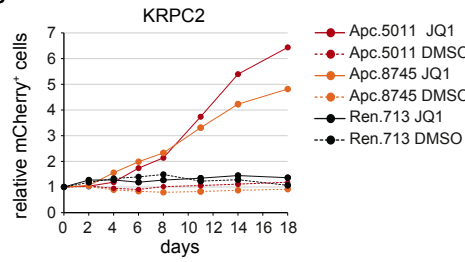

**d**

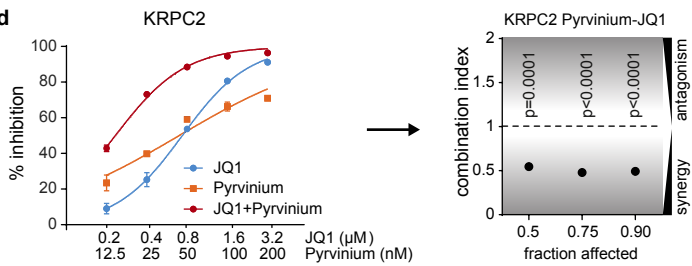

**e**

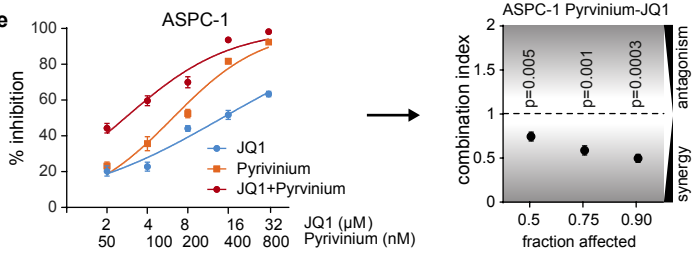

Supplement: NIHMS68846-supplement-ED_Figure_9.pdf [file NIHMS68846-supplement-ED_Figure_9.pdf]
